# Supplementary material for: Impact of novel therapies for mantle cell lymphoma in the real world setting: a report from the UK's Haematological Malignancy Research Network (HMRN)
Source: PubMed Central journal article supplement (PMC5947165; doi:10.1111/bjh.15170), 2018-03-13

**Supplementary Figure 1 Overall & Relative Survival for Watch & Wait with no disease progression (n=18)**

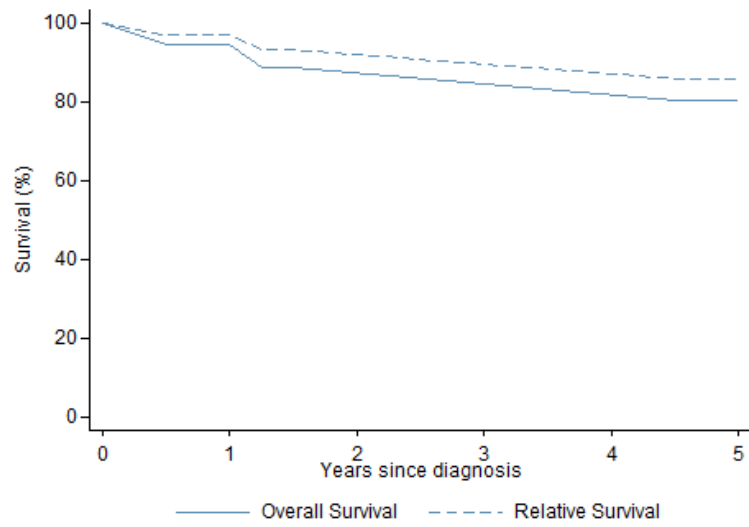

**Supplementary Figure 2 Overall Survival by Ritxumab Immunochemotherapy**

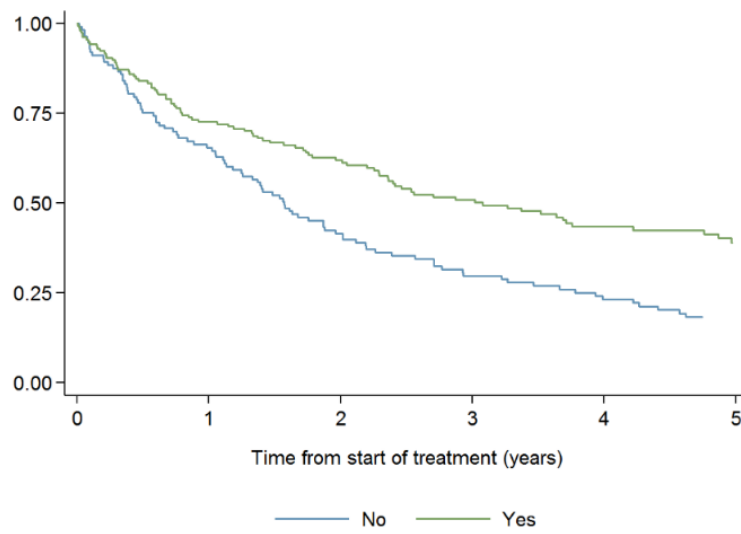

**Supplementary Figure 3 Overall Survival by Consolidation Autologous Stem Cell Transplant**

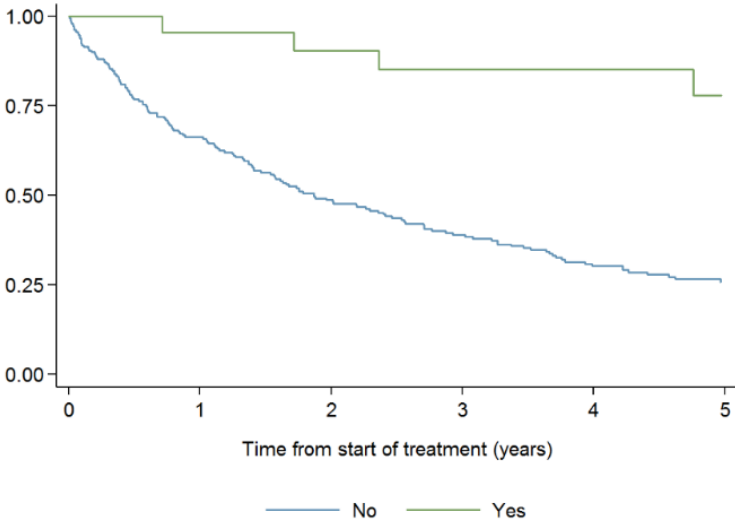

**Supplementary Figure 4 Overall Survival by Line of Treatment**

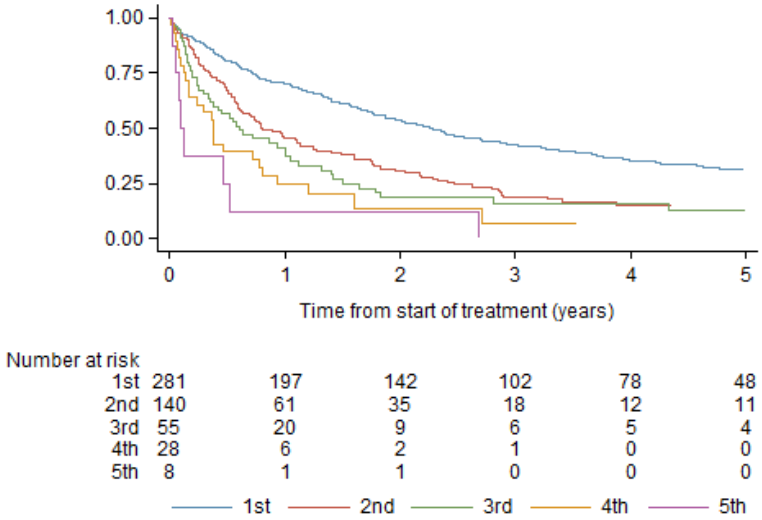

**Supplementary Figure 5 Overall Survival by biological Mantle Cell International Prognostic Index**

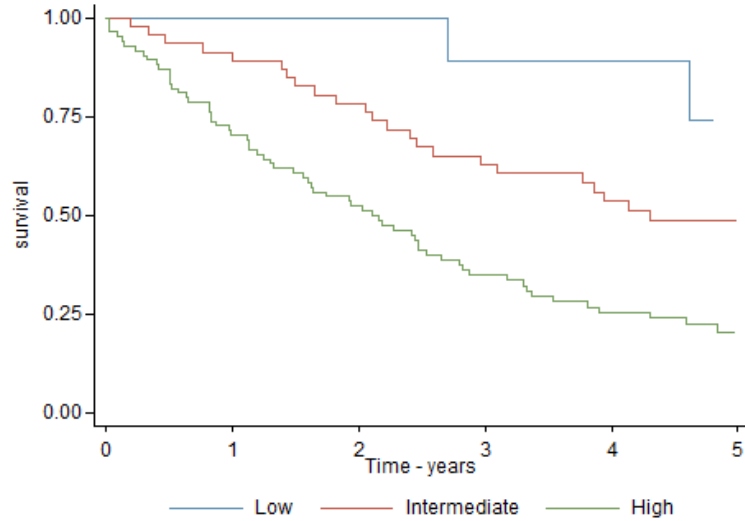

**Supplementary Figure 6 Overall Survival by Mantle Cell International Prognostic Index White Blood Cell Count and First Line Management**

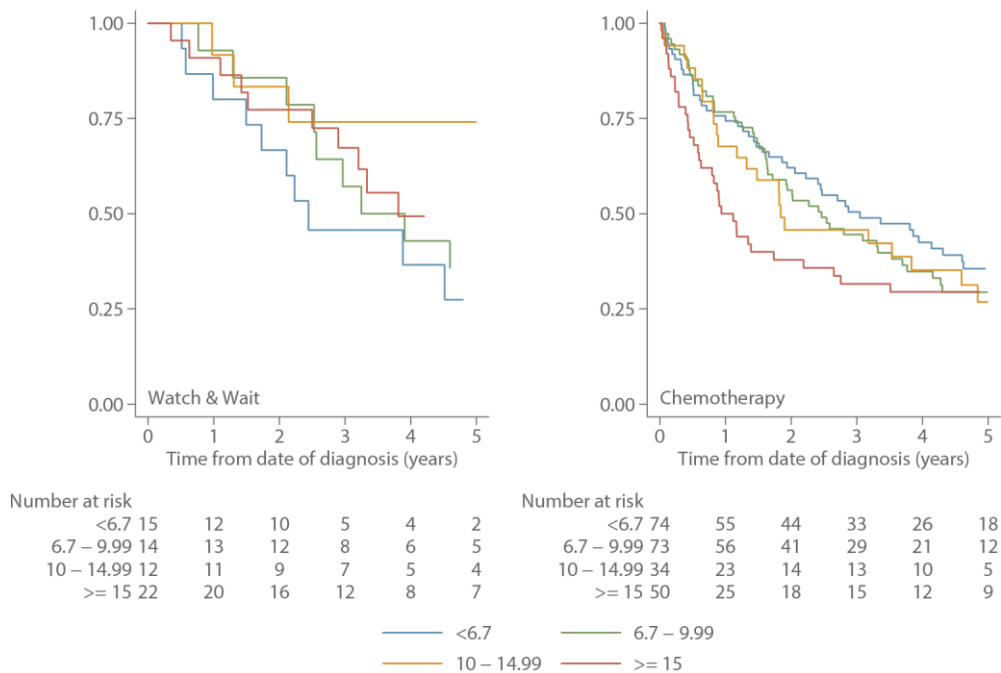

Supplement: BJH-181-215-s001.pdf [file BJH-181-215-s001.pdf]
